# Supplementary material for: Treatment Outcomes in Metastatic Neuroendocrine Carcinoma of the Gallbladder: A Retrospective Analysis from a Tertiary Cancer Centre in India
Source: Research Square preprint supplement (doi:10.21203/rs.3.rs-8075950/v1), 2025-12-22
Supplement: Supplementary file 1 [file 798112b4548b6e9b115be4e9.pdf]

## Supplementary Materials

**Supplementary Table 1.** Details of First Line Treatment regimens received by patients

| Chemotherapy regimen       | Patients treated |
|----------------------------|------------------|
| Etoposide - Platinum       | 54(90%)          |
| Paclitaxel - Irinotecan    | 2 (3.36%)        |
| Carboplatin                | 1(1.66%)         |
| Carboplatin - Atezolizumab | 1(1.66%)         |
| Cisplatin - Irinotecan     | 1(1.66%)         |
| Gemcitabine - Oxalipaltin  | 1(1.66%)         |
| Total                      | 60               |

**Supplementary Table 2.** Details of Second line treatment regimens received by patients

| Chemotherapy regimen       | Patients treated |
|----------------------------|------------------|
| Irinotecan                 | 15 (71.42%)      |
| NabPaclitaxel - Irinotecan | 1 (4.76%)        |
| Etoposide - Carboplatin    | 1 (4.76%)        |
| Carboplatin - Irinotecan   | 1 (4.76%)        |
| Capecitabine - Irinotecan  | 1 (4.76%)        |
| Capecitabine-Temozolamide  | 1 (4.76%)        |
| Carboplatin                | 1 (4.76%)        |
| Total                      | 21               |
